# Supplementary material for: Di-butyltin(iv) complexes with azo-carboxylates: synthesis, characterization, crystal structures and their anti-diabetic assay
Source: Royal Society of Chemistry journal article supplement (doi:10.1039/d0nj00536c), 2020-01-01
Supplement: d0nj00536c1.pdf [file d0nj00536c1.pdf]

*Electronic Supplementary Information for*

**Di-butyltin(IV) complexes with azo-carboxylates:  
Synthesis, characterization, crystal structures and their anti-  
diabetic assay**

Paresh Debnath<sup>1</sup>, Keisham Surjit Singh<sup>1\*</sup>, Khaidem Kennedy Singh<sup>2</sup>, S.Suresh  
kumar Singh<sup>2</sup>, Lesław Sieroń<sup>3</sup>, Waldemar Maniukiewicz<sup>3\*</sup>

<sup>1</sup> Department of Chemistry, National Institute of Technology Agartala, Jirania, Tripura (west)-  
799046, India.

<sup>2</sup> Department of Forestry, North Eastern Regional Institute of Science And Technology, Nirjuli,  
Arunachal Pradesh -791109, India.

<sup>3</sup> Institute of General and Ecological Chemistry, Lodz University of Technology, 90-924 Lodz,  
Zeromskiego 116, Poland

\*Corresponding authors:

*E-mail address:* [keisham.chem@nita.ac.in](mailto:keisham.chem@nita.ac.in), [surjitkeisham@yahoo.co.in](mailto:surjitkeisham@yahoo.co.in) (KSS)  
[waldemar.maniukiewicz@p.lodz.pl](mailto:waldemar.maniukiewicz@p.lodz.pl) (WM)

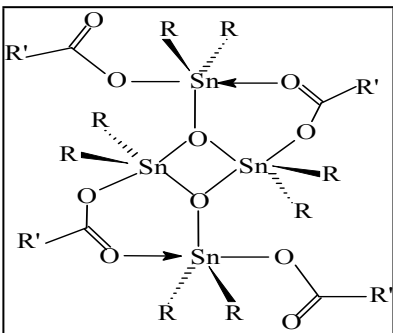

Endo. Sn: distorted trigonal bipyramidal  
Exo. Sn: distorted trigonal bipyramidal

(I)

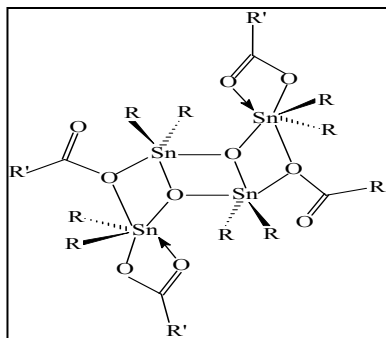

Endo. Sn: distorted trigonal bipyramidal  
Exo. Sn: distorted octahedral

(II)

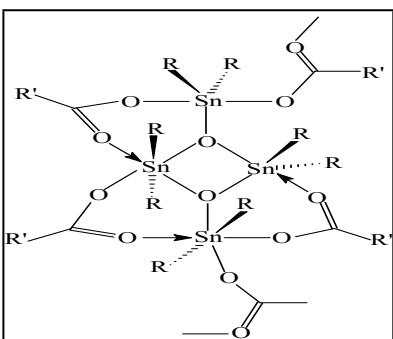

Sn: Polymeric distorted octahedral and  
distorted trigonal bipyramidal

(III)

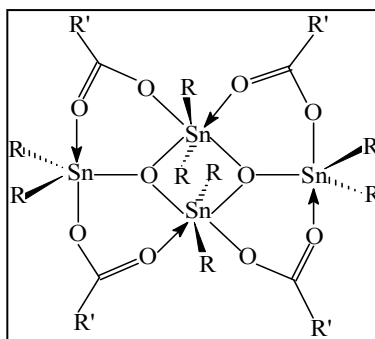

Endo. Sn: distorted octahedral  
Exo. Sn: distorted trigonal bipyramidal

(IV)

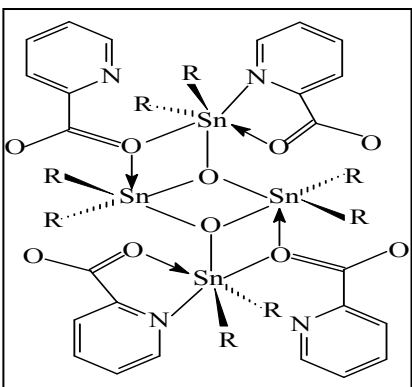

Endo. Sn: distorted trigonal bipyramidal  
Exo. Sn: distorted octahedral

(V)

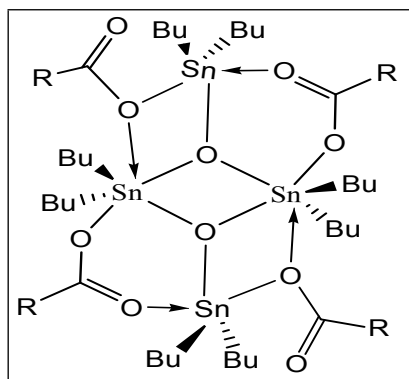

Endo. Sn: distorted octahedral  
Exo. Sn: distorted trigonal bipyramidal

(Structural motif adopted by complex 2)

**Scheme S1.** Structural motifs shown by diorganotin,  $\{[R_2 Sn(O_2CR')]_2O\}_2$  type complexes.

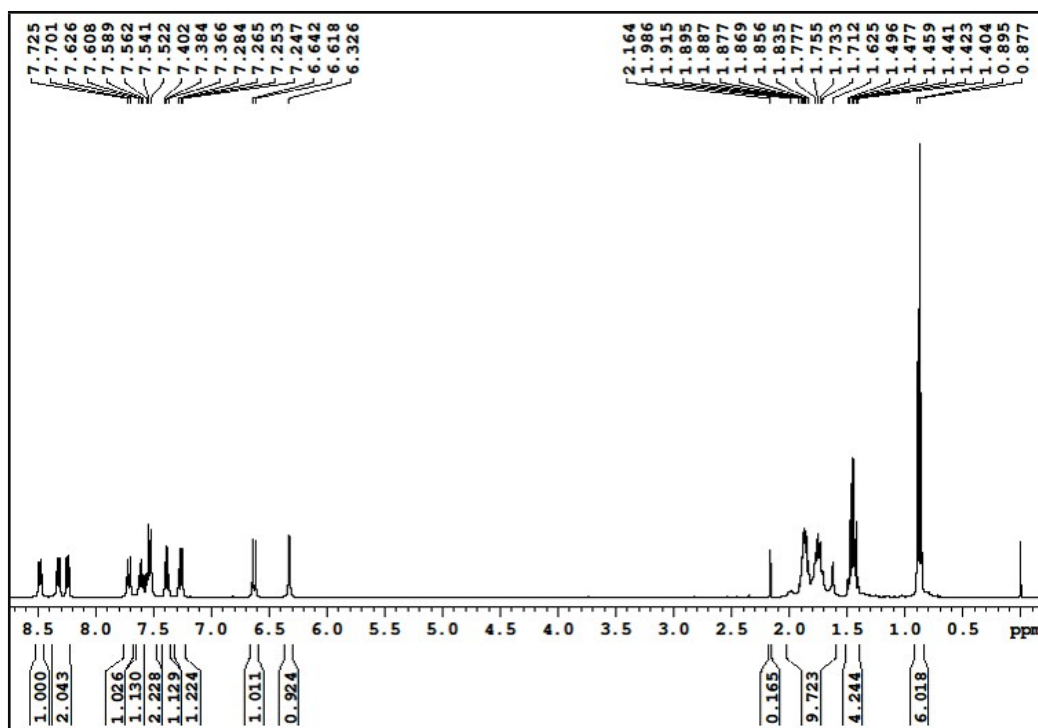

Fig.S1(a): <sup>1</sup>H-NMR spectrum of complex [Bu<sub>2</sub>SnHL<sup>1</sup>O]<sub>2</sub>(1)

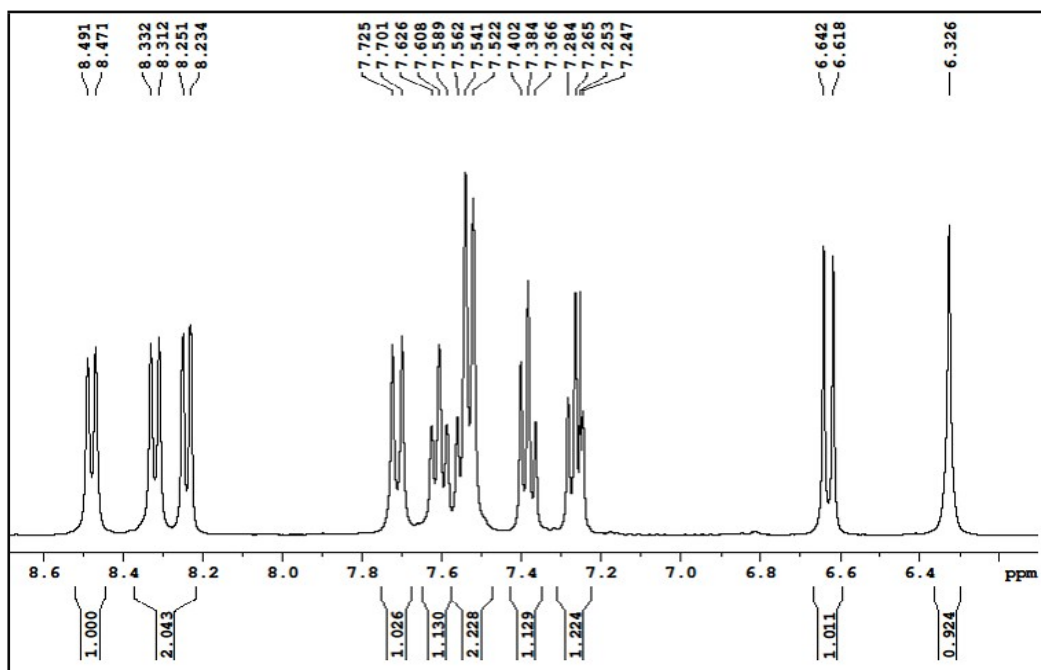

Fig.S1(b): <sup>1</sup>H-NMR spectrum of complex [Bu<sub>2</sub>SnHL<sup>1</sup>O]<sub>2</sub>(1) (Expansion near down field region showing various multiplicity pattern)

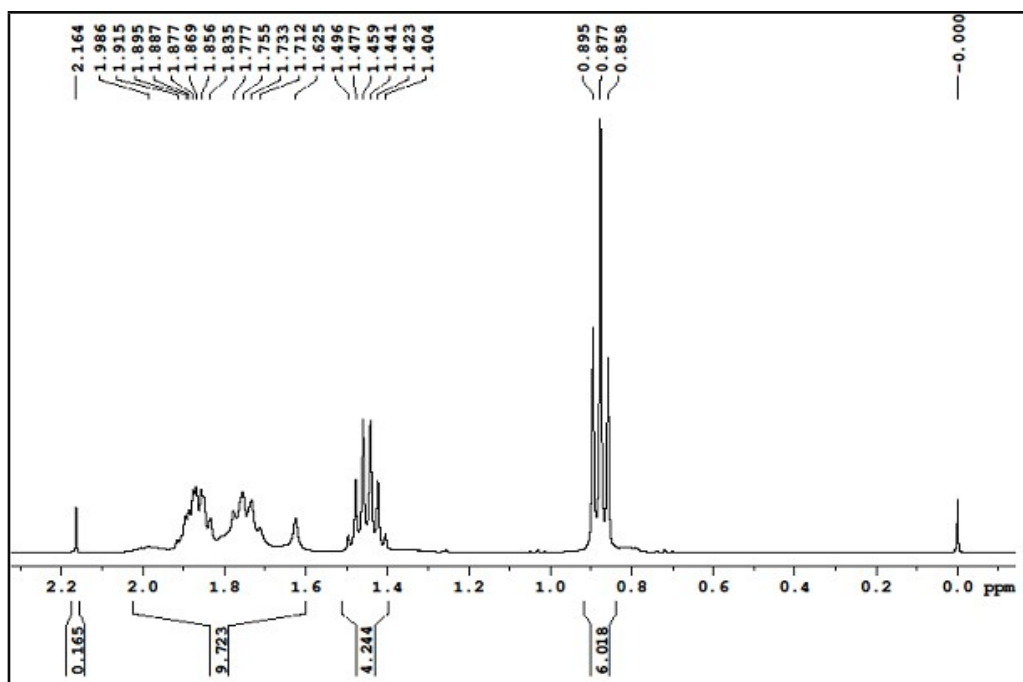

**Fig. S1(c):**  $^1\text{H}$ -NMR spectrum of complex  $[\text{Bu}_2\text{SnHL}^1\text{O}]_2(\mathbf{1})$  (Expansion near upfield region showing various multiplicity pattern)

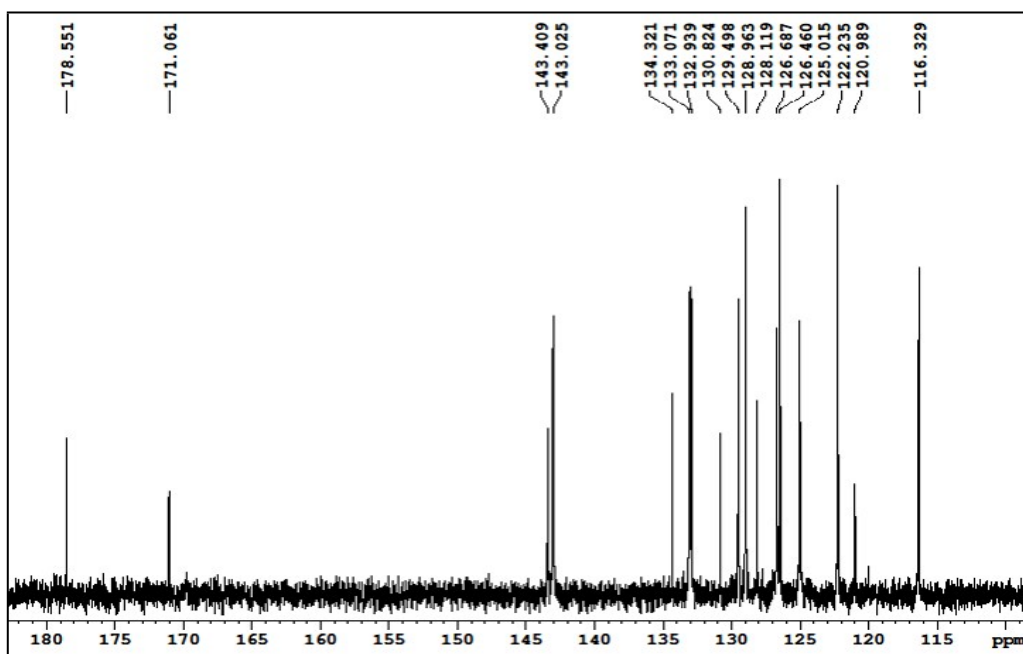

**Fig.S1(d):**  $^{13}\text{C}$ -NMR spectrum of complex  $[\text{Bu}_2\text{SnHL}^1\text{O}]_2(\mathbf{1})$  (Expansion)

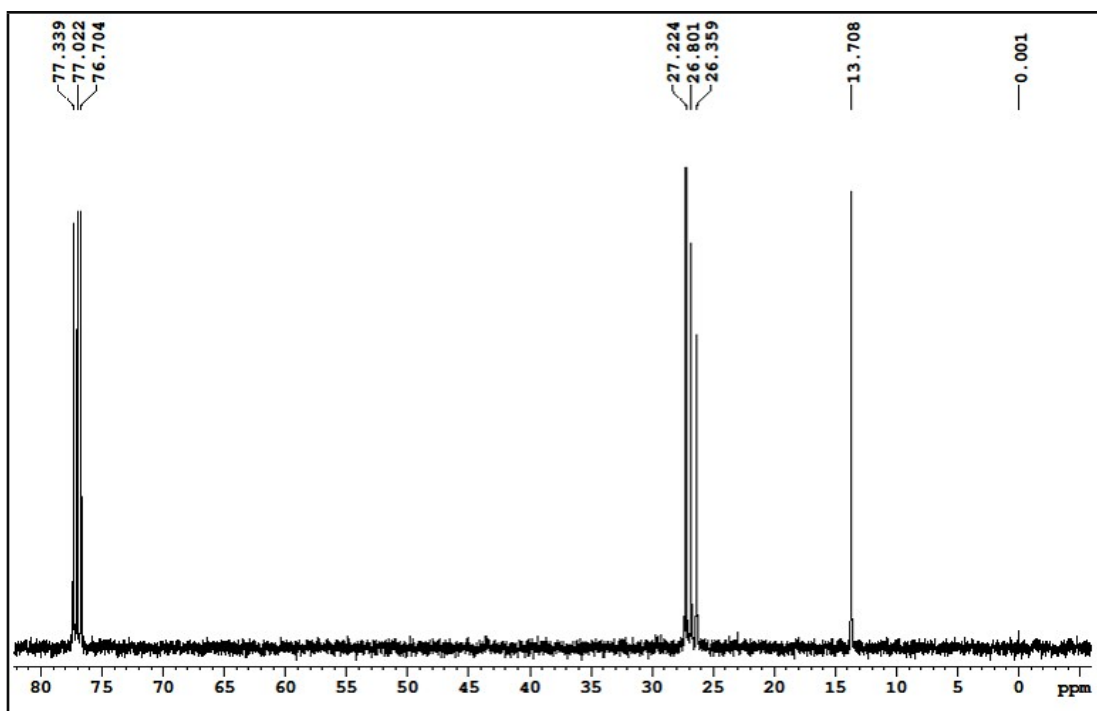

**Fig.S1(e):**  $^{13}\text{C}$ -NMR spectrum of complex  $[\text{Bu}_2\text{SnHL}^1\text{O}]_2(\mathbf{1})$  (Expansion in the upfield region)

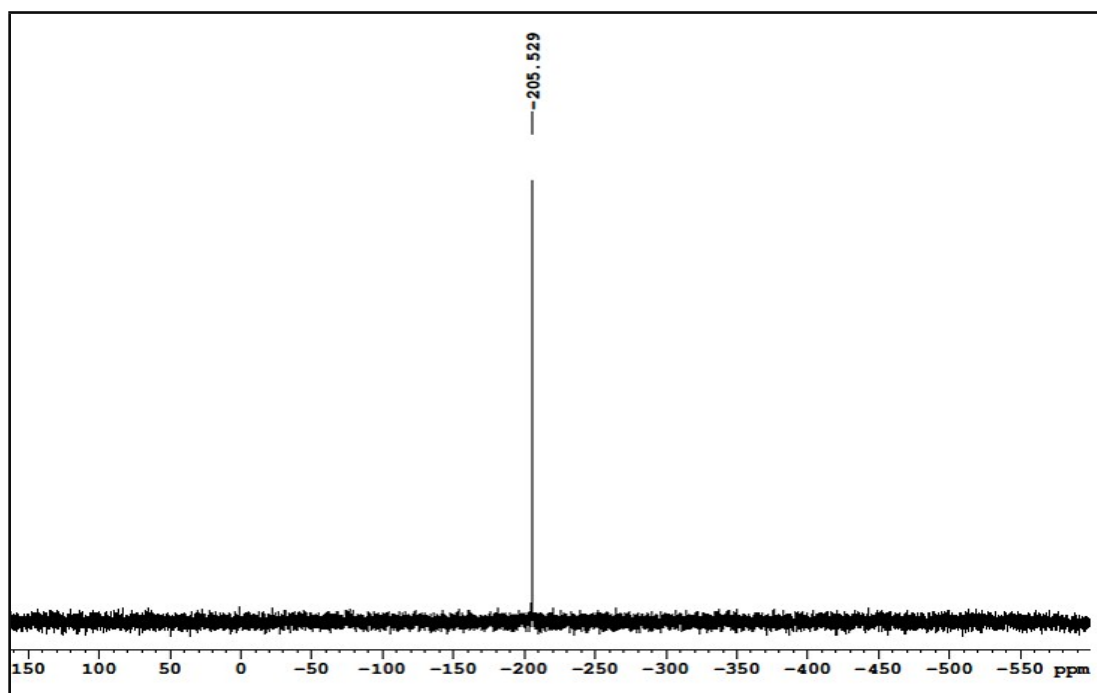

**Fig.S1(f):**  $^{119}\text{Sn}$ -NMR spectrum of complex  $[\text{Bu}_2\text{SnHL}^1\text{O}]_2(\mathbf{1})$

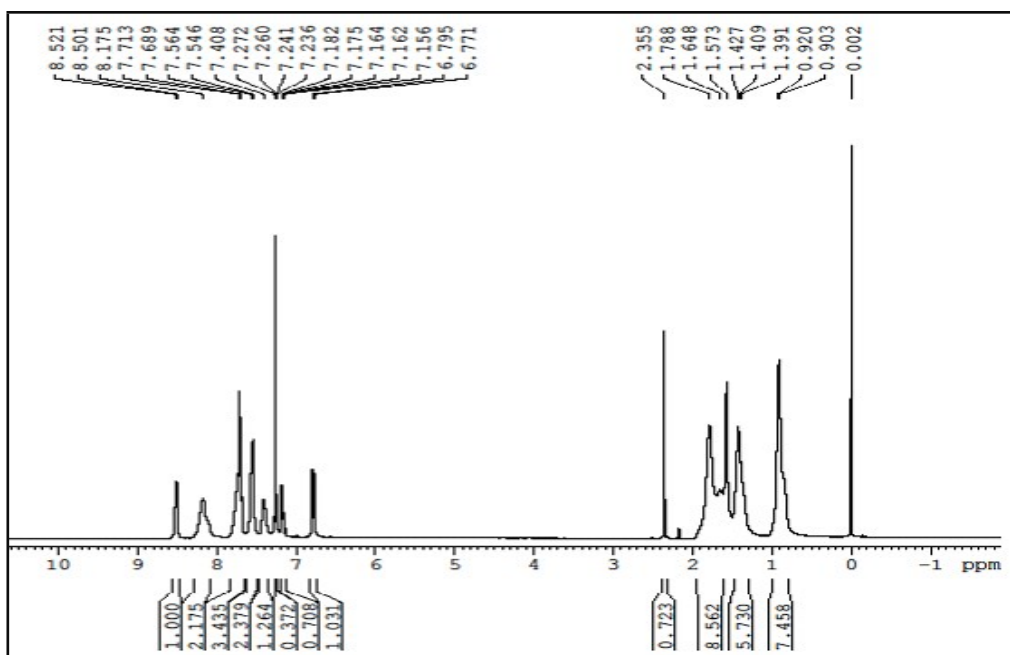

**Fig.S2(a):**  $^1\text{H-NMR}$  spectrum of complex  $\{[\text{Bu}_2\text{SnHL}^2]_2\text{O}\}_2(\mathbf{2})$

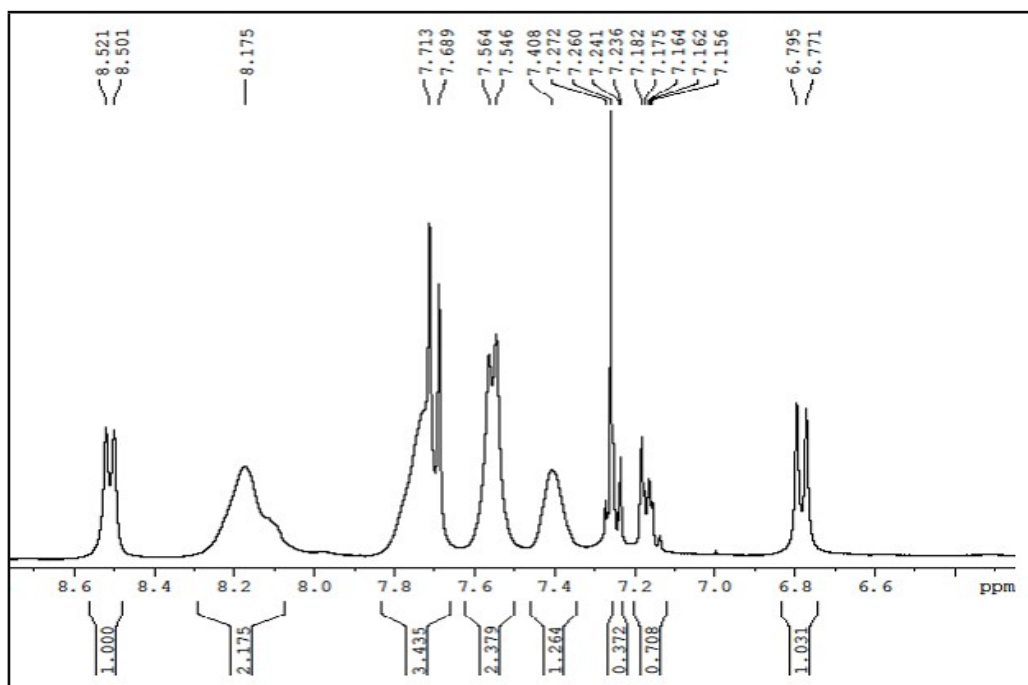

**Fig.S2(b):**  $^1\text{H-NMR}$  spectrum of complex  $\{[\text{Bu}_2\text{SnHL}^2]_2\text{O}\}_2(\mathbf{2})$  (Expansion near down field region showing various multiplicity pattern)

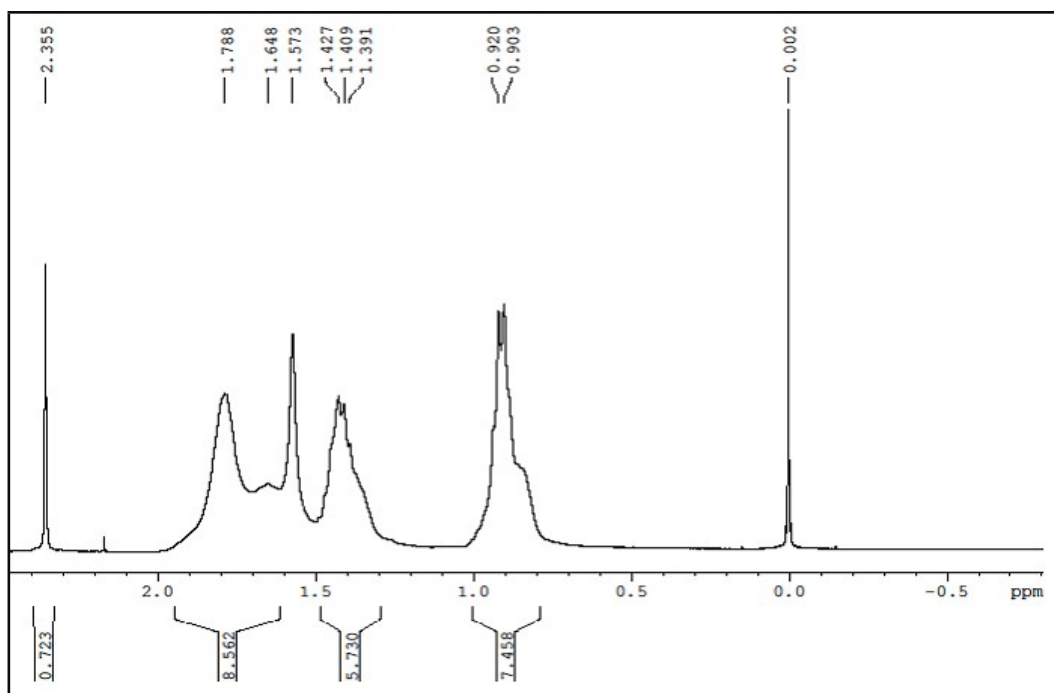

**Fig. S2(c):** <sup>1</sup>H-NMR spectrum of complex  $\{[Bu_2SnHL^2]_2O\}_2(\mathbf{2})$  (Expansion near upfield region)

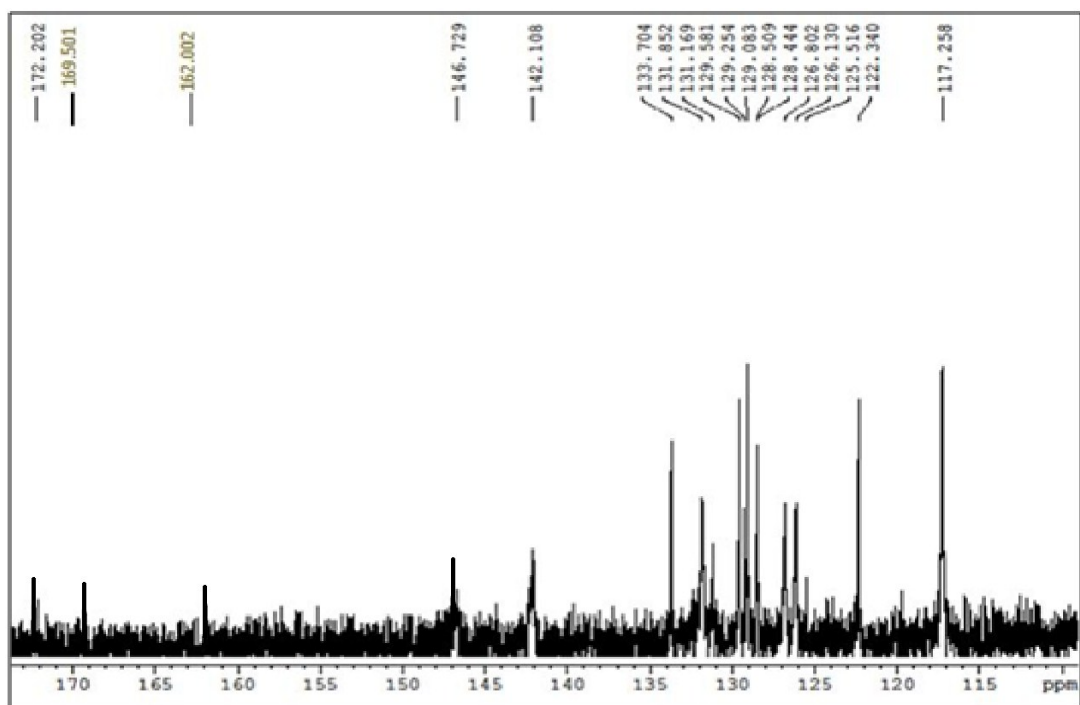

**Fig.S2(d):** <sup>13</sup>C-NMR spectrum of complex  $\{[Bu_2SnHL^2]_2O\}_2(\mathbf{2})$  (Expansion)

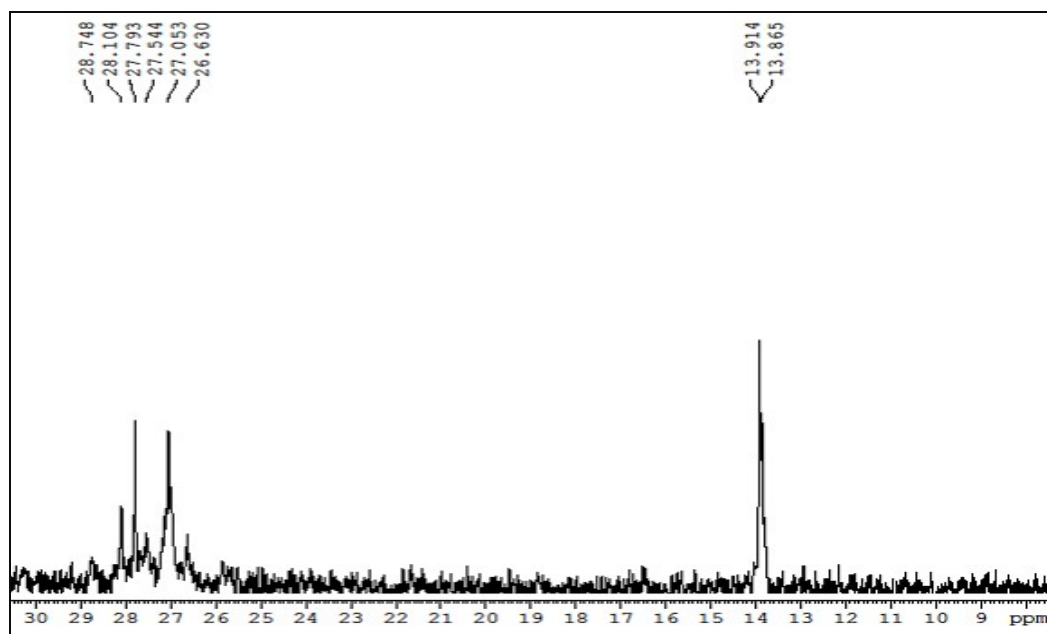

**Fig.S2(e):**  $^{13}\text{C}$ -NMR spectrum of complex  $\{[\text{Bu}_2\text{SnHL}^2]_2\text{O}\}_2(\mathbf{2})$  (Expansion near the upfield region)

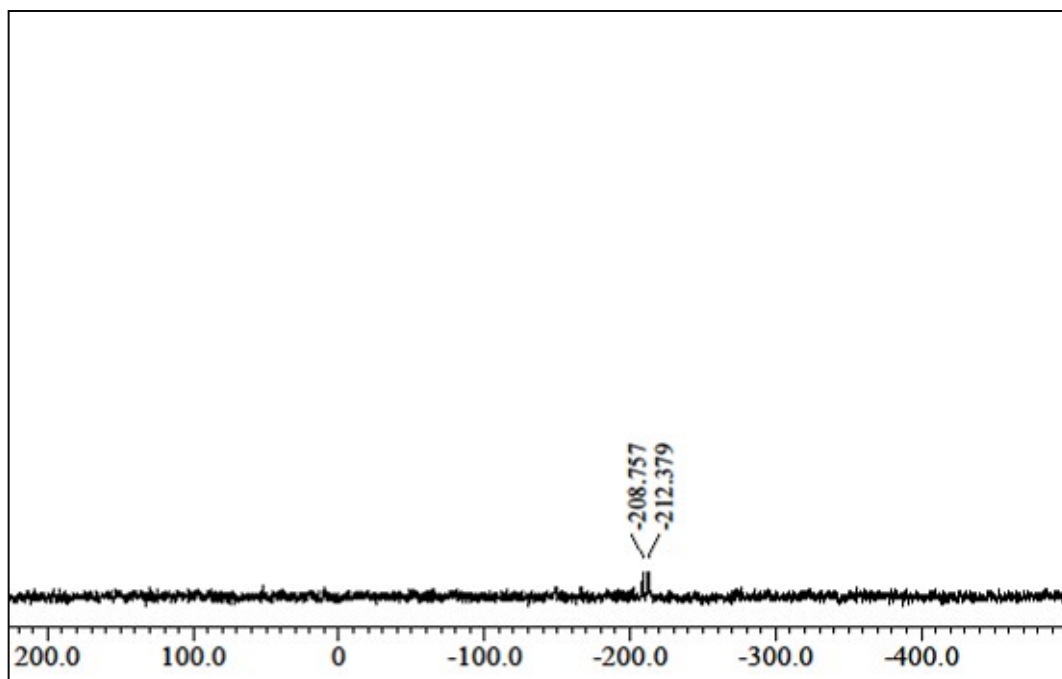

**Fig.S2(f):**  $^{119}\text{Sn}$ -NMR spectrum of complex  $\{[\text{Bu}_2\text{SnHL}^2]_2\text{O}\}_2(\mathbf{2})$



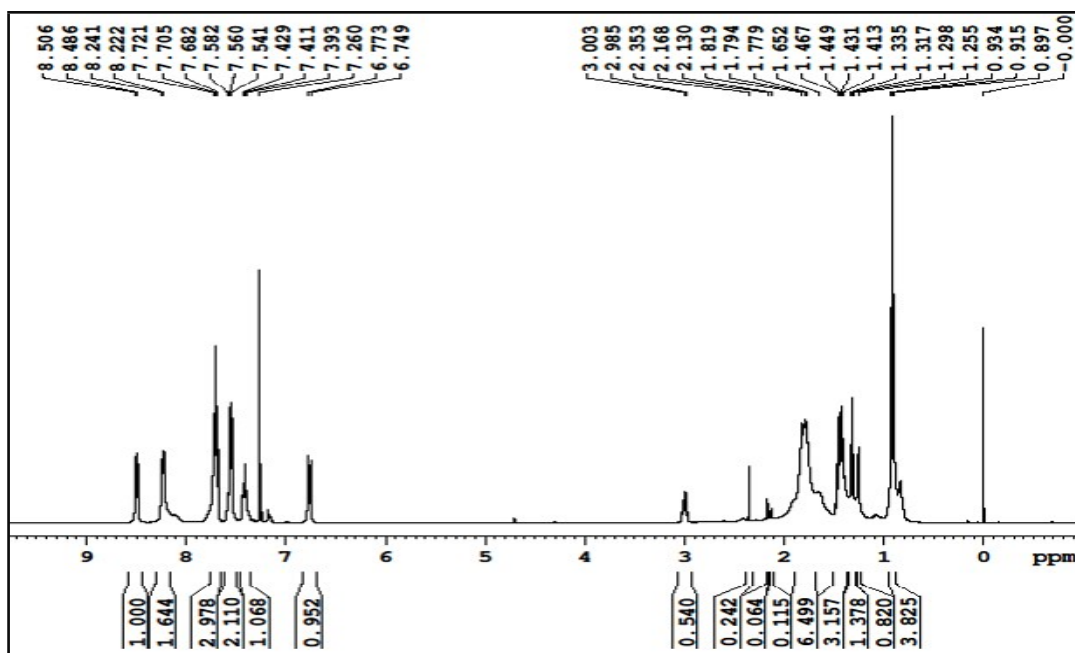

Fig.S3(a):  $^1\text{H-NMR}$  spectrum of complex  $\text{Bu}_2\text{Sn}[\text{HL}^2]_2(\mathbf{3})$

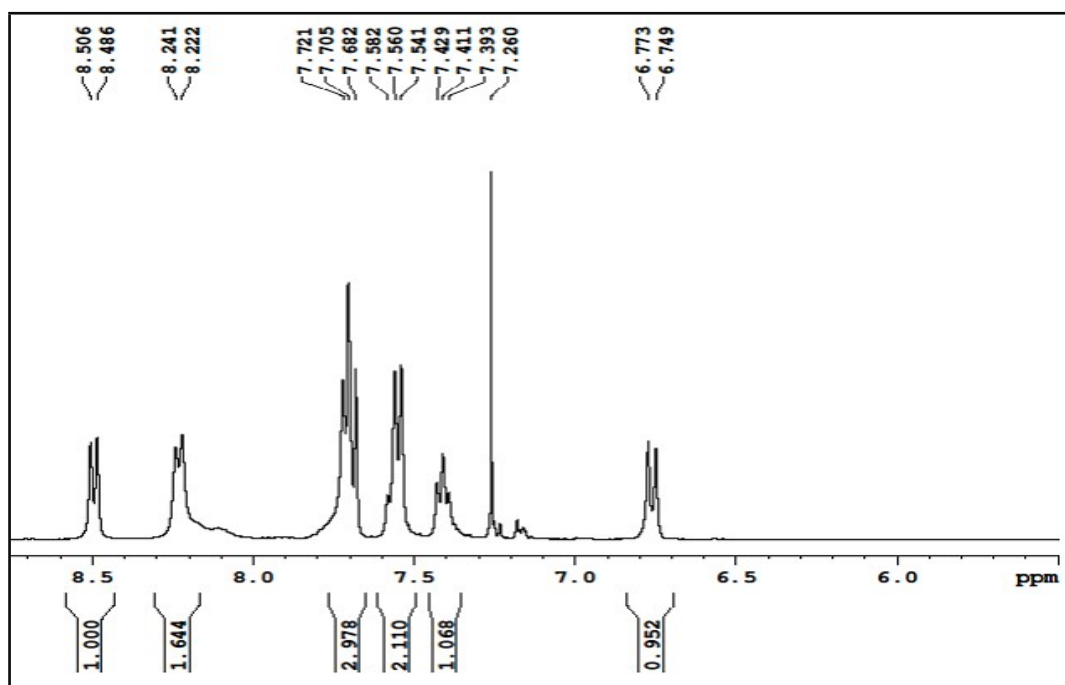

Fig.S3(b):  $^1\text{H-NMR}$  spectrum of complex  $\text{Bu}_2\text{Sn}[\text{HL}^2]_2(\mathbf{3})$  (Expansion near down field region showing various multiplicity pattern)

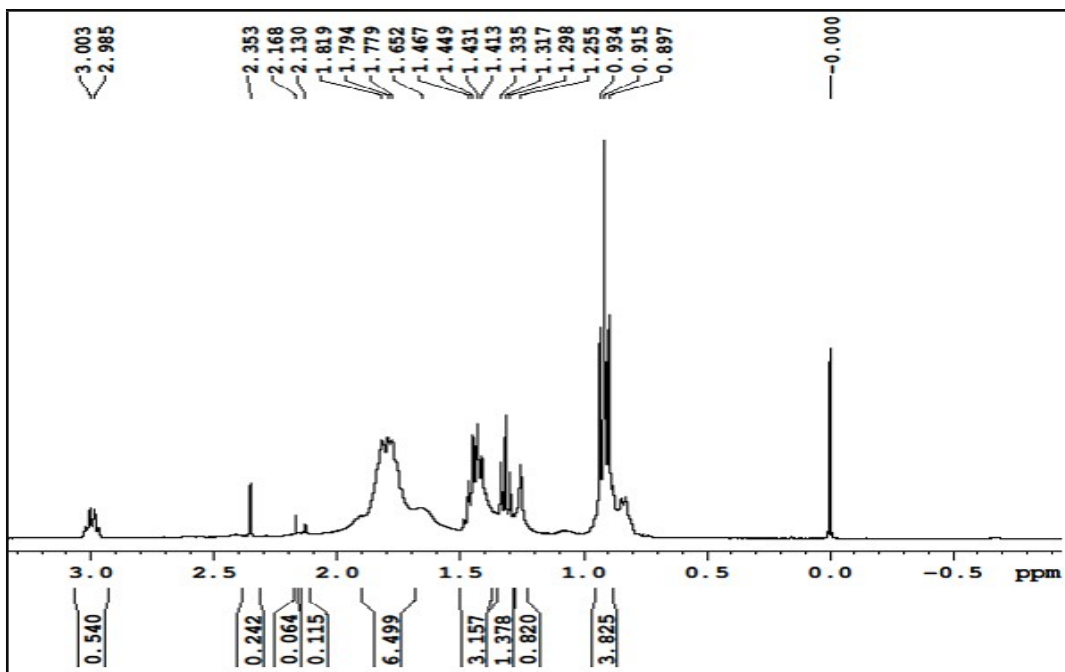

**Fig. S3(c):**  $^1\text{H}$ -NMR spectrum of complex  $\text{Bu}_2\text{Sn}[\text{HL}^2]_2(\mathbf{3})$  (Expansion near up field region showing splitting of the tin-butyl skeleton)

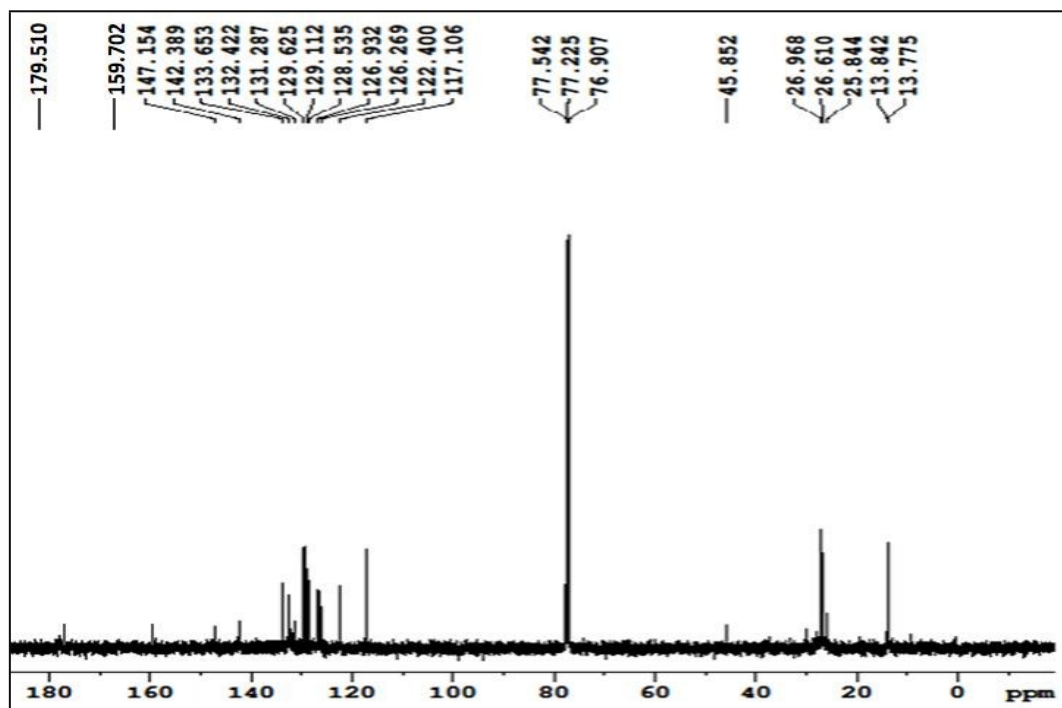

**Fig.S3(d):**  $^{13}\text{C}$ -NMR spectrum of complex  $\text{Bu}_2\text{Sn}[\text{HL}^2]_2(\mathbf{3})$

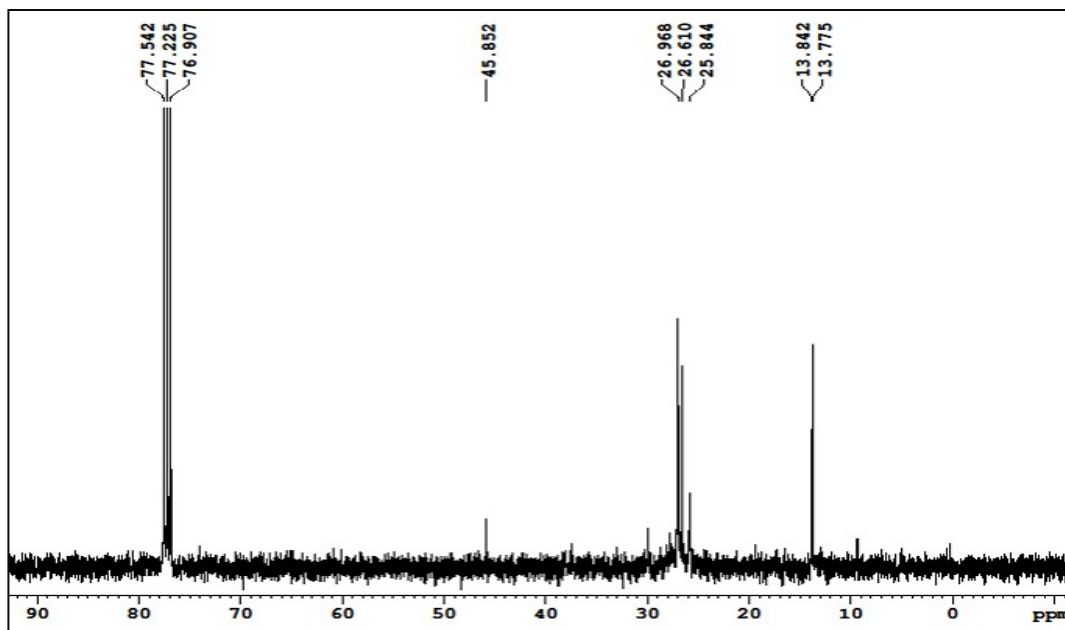

**Fig.S3(e):**  $^{13}\text{C}$ -NMR spectrum of complex  $\text{Bu}_2\text{Sn}[\text{HL}^2]_2(\mathbf{3})$  (Expansion in the upfield region)

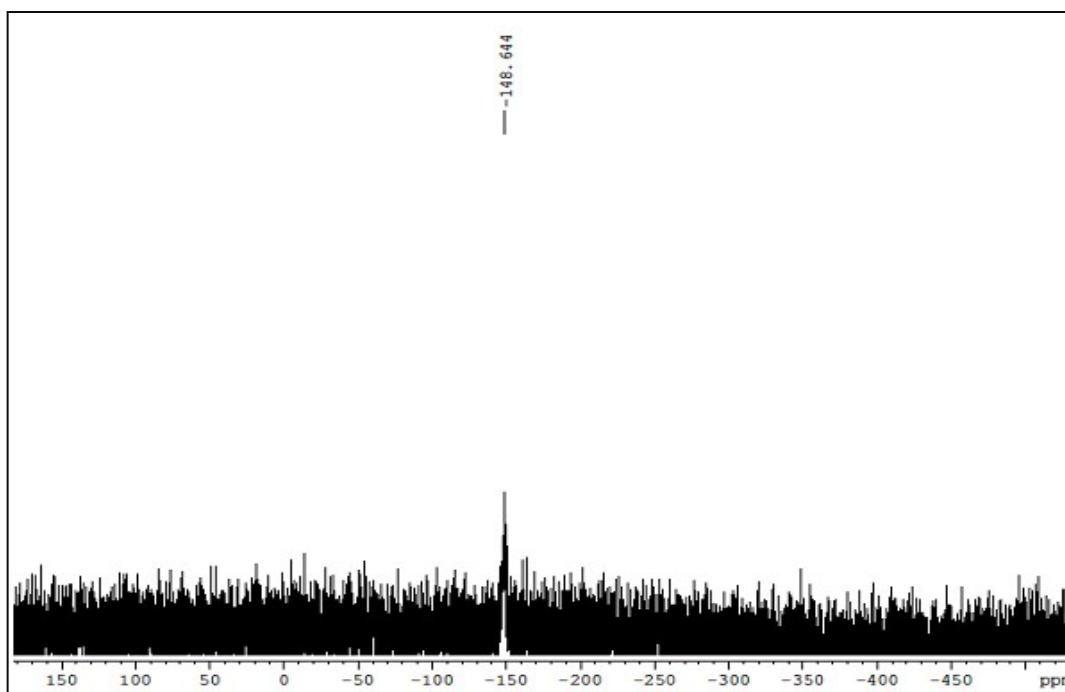

**Fig.S3(f):**  $^{119}\text{Sn}$ -NMR spectrum of complex  $\text{Bu}_2\text{Sn}[\text{HL}^2]_2(\mathbf{3})$

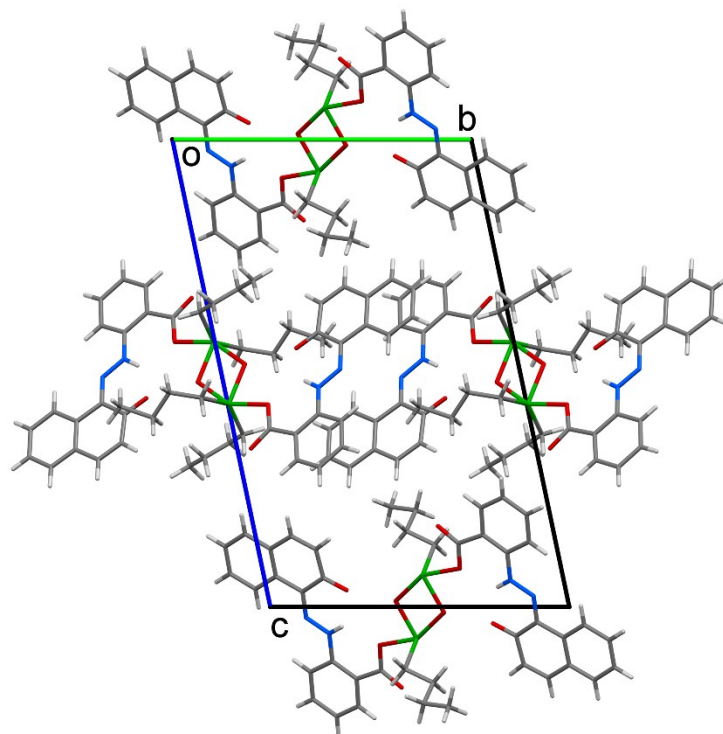

**Fig. S4** Packing diagram of  $[\text{Bu}_2\text{SnHL}^1\text{O}]_2(\mathbf{1})$

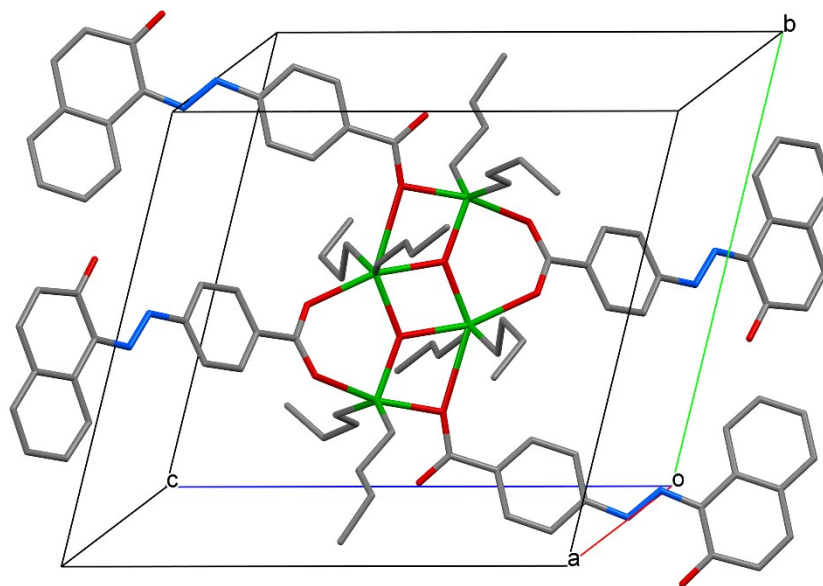

**Fig. S5** Packing diagram of  $\{[\text{Bu}_2\text{SnHL}^2]_2\text{O}\}_2(\mathbf{2})$ . The hydrogen atoms omitted for clarity.

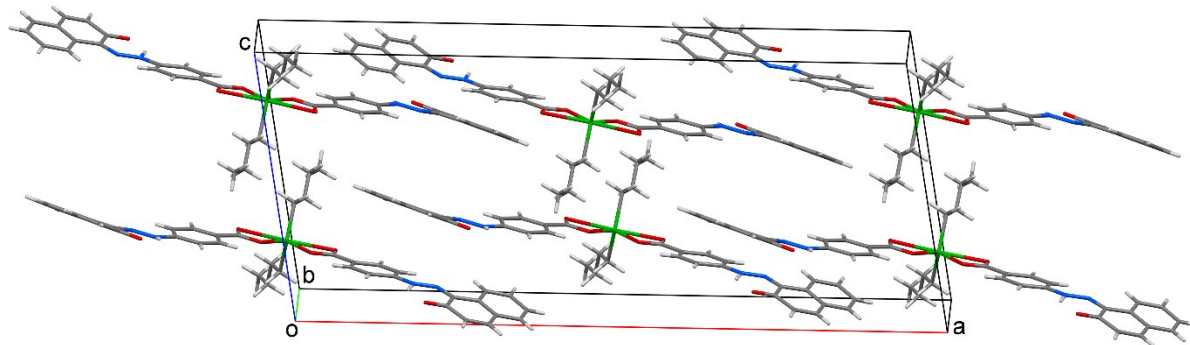

**Fig. S6** Packing diagram of  $\text{Bu}_2\text{Sn}[\text{HL}^2]_2(\mathbf{3})$
